*D. Hauri*

# **Grosshadern Prize for Innovative Research in Urology 1994**

The Grosshadern Prize for Innovative Research in Urology 1994 was generously offered for the first time by a German pharmaceutical company. This prize is designated as a support to young urologists in their experimental research work. Approximately 20 manuscripts were submitted to be judged by a jury. Most of the manuscripts reflected a high standard. The three best papers were awarded the first prize ex aequo. They are subsequently published in full length. We are pleased that the Grosshadern Prize for Innovative Research in Urology will be awarded annually.
